# Supplementary material
Source: PubMed Central journal article supplement (PMC5668689)
Supplement: NIHMS867683-supplement-SI.pdf [file NIHMS867683-supplement-SI.pdf]

## Supporting Information

### Acoustic Separation of Nanoparticles in Continuous Flow

Mengxi Wu, Zhangming Mao, Kejie Chen, Hunter Bachman, Yuchao Chen, Joseph Rufo, Liqiang Ren, Peng Li, Lin Wang and Tony Jun Huang\*

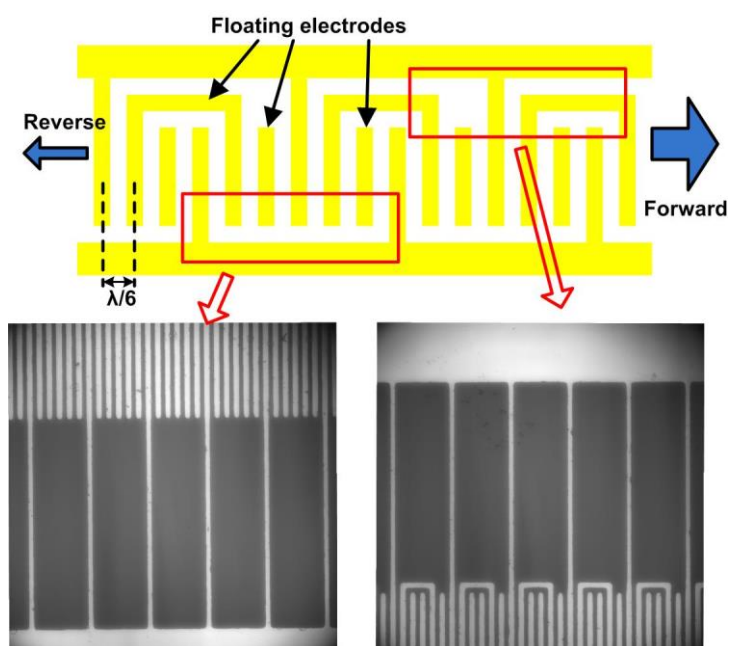

**Figure S1.** The configuration of unidirectional IDT design. The floating electrodes help to cancel the reverse Rayleigh waves, thus increasing the amplitude of the forward wave.

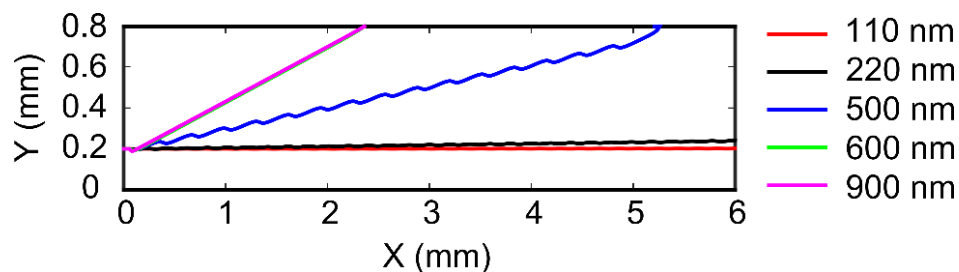

**Figure S2.** Calculated particles' trajectories in the channel when subjected to the same amplitude of acoustic energy density.

**Video S1.** 500 nm particles are deflected by the acoustic field.

**Video S2.** 110 nm particles are not deflected by the acoustic field, and thus are separated from 500 nm particles.
